# Supplementary material for: Causal and Synthetic Associations of Variants in the SERPINA Gene Cluster with Alpha1-antitrypsin Serum Levels
Source: PLoS Genet. 2013 Aug 22;9(8):e1003585. doi: 10.1371/journal.pgen.1003585 (PMC3749935; doi:10.1371/journal.pgen.1003585)
Supplement: Table S2 — Characteristics of study populations contributing to the SNP association analyses with FEV1. (XLS) [file pgen.1003585.s006.xls]

## Sheet: Study sample characteristics
Table S2. Characteristics of study populations contributing to the SNP association analyses with FEV1.
Study	Sample Size (Ever Smokers)	Women [%]	Age [years], mean; SD	FEV1 [ml], mean; SD	Current smokers [%]	Height [cm], mean; SD	BMI [kg/m2], mean; SD
British 1958 Birth Cohort (B58C)	4225	49.2	45.1; 0.4	3268; 473	33.2	169.6; 6.3	27.3; 4.8
Busselton Health Study (BHS)	1977	46.1	53.5; 15.9	2980; 951	28	169.6; 9.2	26.5; 4.2
Copenhagen City Heart Study (Copenhagen)	6437	51.8	58.6; 14.4	2671; 993	62.6	168.6; 9.4	25.6; 4.3
Kooperative Gesundheitsforschung in der Region Augsburg (KORA S3)	536	45.9	44.2; 8.6	3617; 821	45.2	171.3; 9.2	25.5; 3.8
Kooperative Gesundheitsforschung in der Region Augsburg (KORA F4)	802	48	51.5; 5.7	3368; 807	36.2	170.8; 9.1	27.6; 5.1
Lothian Birth Cohort 1936 (LBC36)	554	42.2	69.6; 0.8	2332; 705	22.2	167.0; 8.7	28.0; 4.5
Lung Health Study (LHS)	539	37.5	48.6; 6.7	2591; 574	100	171.3; 8.6	na
Northern Finland Birth Cohort 1966 (NFBC66)	3324	52	31.0; 0.2	3973; 788	61.5	171.5; 9.1	24.8; 4.3
SAPALDIA	3037	44.4	42.0; 10.5	3617; 815	56	170.2; 8.6	24.0; 3.6
Study of Health in Pomerania (SHIP)	995	39	46.5; 13.8	3380; 871	57.9	171.5; 8.6	28.1; 4.8
CROTIA-Korcula (Korcula)	423	55.1	52.7; 13.1	2892; 748	46.3	170.1; 8.9	27.5; 4.2
Northern Swedish Population Health Study (NSPHS)	121	52.1	51.5; 16.8	2788; 1005	100	164.3; 9.8	25.9; 4.3
Orkney Complex Disease Study (ORCADES)	288	43.8	55.7; 15.0	2903; 828	20.8	168.6; 8.5	27.9; 4.8
CROTIA-Split (Split)	254	53.1	49.1; 13.4	3207; 876	48	173.7; 9.1	26.9; 4.2
CROTIA-Vis (Vis)	537	43.6	53.1; 14.8	3677; 116	45.5	170.1; 9.5	27.2; 4.4
eQTL-Groningen (Groningen)	133	47.7	57.2; 10.2	2200; 900	23	172.1; 10.2	23.9; 3.9
eQTL-University of British Columbia (UBC)	264	44.3	60.7; 13.2	2200; 830	37.9	167.9; 10.4	25.5; 5.3
